# Supplementary material for: Facile synthesis of porous Fe2TiO5microparticulates serving as anode material with enhanced electrochemical performances
Source: Royal Society of Chemistry journal article supplement (doi:10.1039/c5ra22930h), 2015-01-01
Supplement: c5ra22930h1.pdf [file c5ra22930h1.pdf]

## **Facile synthesis of porous Fe<sub>2</sub>TiO<sub>5</sub> microparticulates serving as anode material with enhanced electrochemical performances**

Shimei Guo,<sup>a,b</sup> Shenyu Wang,<sup>a</sup> Nannan Wu,<sup>a</sup> Jiurong Liu,<sup>a,\*</sup> Yuxing Ni,<sup>c</sup> and Wei Liu<sup>c,\*</sup>

<sup>a</sup> Key Laboratory for Liquid–Solid Structural Evolution and Processing of Materials, Ministry of Education and School of Materials Science and Engineering, Shandong University, Shandong 250061, China

<sup>b</sup> College of Physics and Electronic Engineering, Qujing Normal University, Yunnan 655011, China

<sup>c</sup> State Key Laboratory of Crystal Materials, Shandong University, Shandong 250100, China

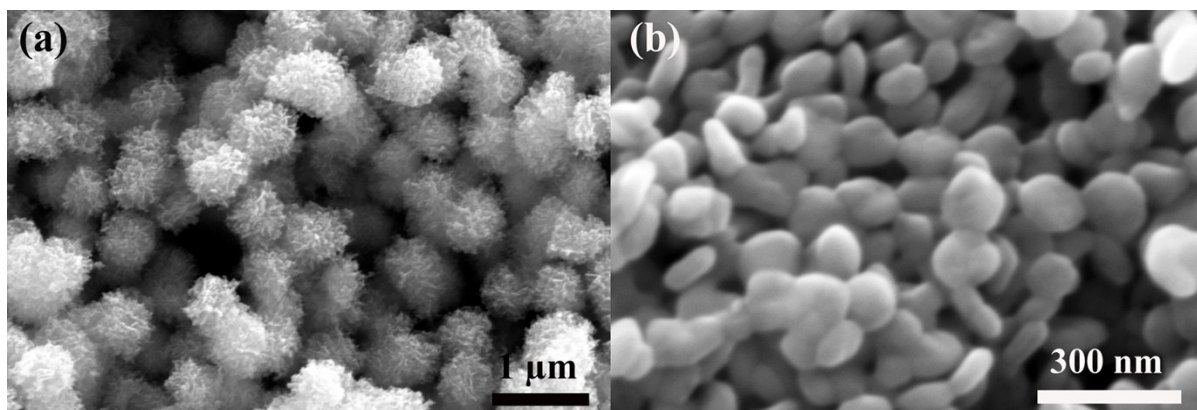

**Fig. S1** SEM image of TiO<sub>2</sub> microspheres (a) and Fe<sub>2</sub>O<sub>3</sub> nanoparticles (b).

**Table S1.** Rate performances of TiO<sub>2</sub> microspheres, Fe<sub>2</sub>O<sub>3</sub> nanoparticles and porous Fe<sub>2</sub>TiO<sub>5</sub> microparticulates at different current densities (mA g<sup>-1</sup>).

| Materials                        | Capacities of the 10th cycle at various densities (mA g <sup>-1</sup> ) |     |     |     |      |                |
|----------------------------------|-------------------------------------------------------------------------|-----|-----|-----|------|----------------|
|                                  | 100                                                                     | 200 | 400 | 800 | 1600 | 100 (returned) |
| TiO <sub>2</sub>                 | 99                                                                      | 76  | 59  | 42  | 31   | 95             |
| Fe <sub>2</sub> O <sub>3</sub>   | 246                                                                     | 124 | 74  | 35  | 10   | 126            |
| Fe <sub>2</sub> TiO <sub>5</sub> | 364                                                                     | 286 | 239 | 173 | 118  | 356            |

**Table S2.**  $R_e$ ,  $R_{sf}$  and  $R_{ct}$  values of  $TiO_2$  microspheres,  $Fe_2O_3$  nanoparticles and porous  $Fe_2TiO_5$  microparticulates after 100 cycles at a current density of  $100 \text{ mA g}^{-1}$ .

| Sample      | $R_e$ ( $\Omega$ ) | $R_{sf}$ ( $\Omega$ ) | $R_{ct}$ ( $\Omega$ ) | $R_e + R_{sf} + R_{ct}$ ( $\Omega$ ) |
|-------------|--------------------|-----------------------|-----------------------|--------------------------------------|
| $TiO_2$     | 7.91               | 74.67                 | 238.92                | 321.5                                |
| $Fe_2O_3$   | 6.35               | 95.59                 | 187.6                 | 289.54                               |
| $Fe_2TiO_5$ | 6.95               | 21.46                 | 113.49                | 141.9                                |
